# Supplementary material for: Ecohydrological particle model based on representative domains
Source: Copernicus journal article supplement (doi:10.5194/hess-22-3639-2018), 2018-07-06

Supplement of Hydrol. Earth Syst. Sci., 22, 3639–3662, 2018  
<https://doi.org/10.5194/hess-22-3639-2018-supplement>  
© Author(s) 2018. This work is distributed under  
the Creative Commons Attribution 4.0 License.

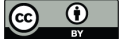

*Supplement of*

## **Ecohydrological particle model based on representative domains**

**Conrad Jackisch and Erwin Zehe**

*Correspondence to:* Conrad Jackisch (jackisch@kit.edu)

The copyright of individual parts of the supplement might differ from the CC BY 4.0 License.

Simulation of the irrigation experiment using echoRD at a loess site (Weiherbach basin, SW Germany)

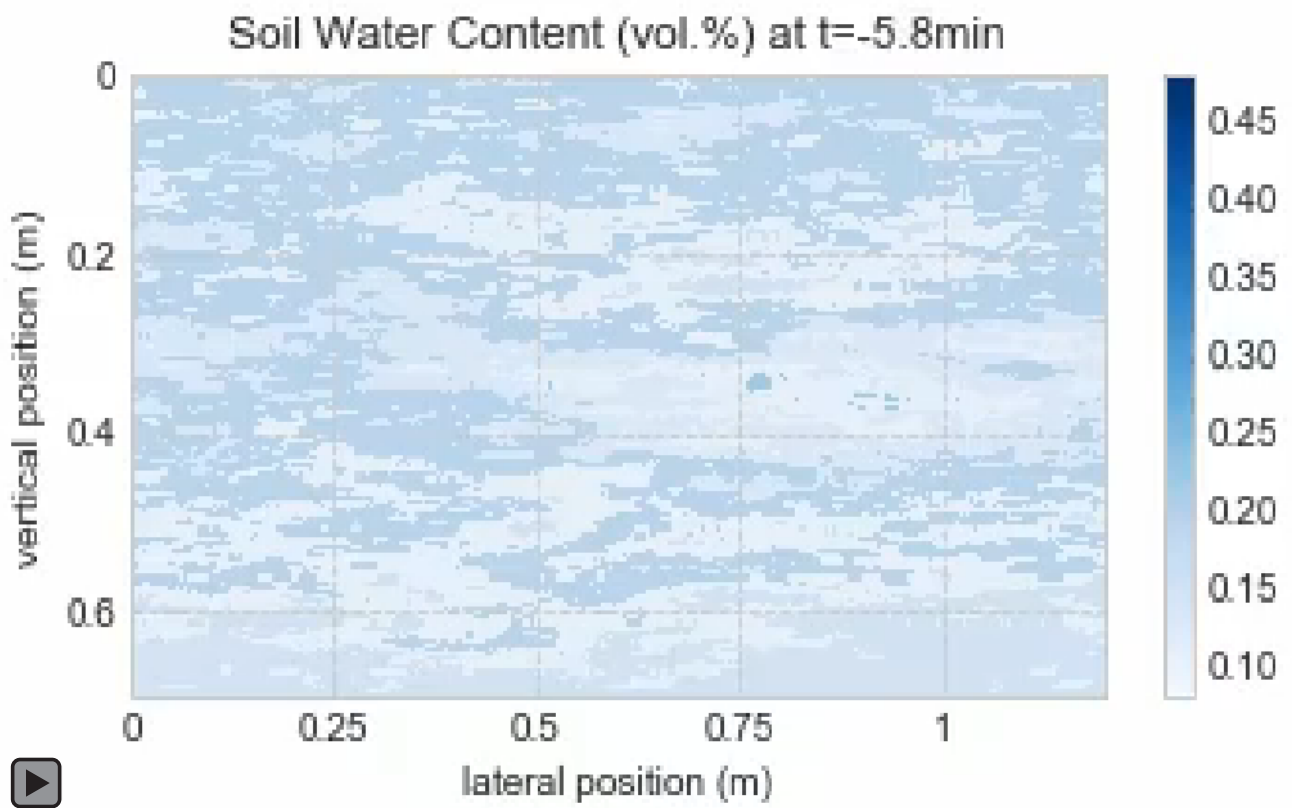

Supplement: Supplementary file 1 [file hess-22-3639-2018-supplement.pdf]
